# Supplementary material for: Studying the Impact of Persistent Organic Pollutants Exposure on Human Health by Proteomic Analysis: A Systematic Review
Source: MDPI journal article supplement (doi:10.3390/ijms232214271), 2022-11-17
Supplement: s1 [file s1]

### Supplementary Materials: Search strategy (Pubmed)

- 1) aldrin proteomic
- 2) ("Aldrin" [Mesh]) AND "proteomics" [Mesh]
- 3) chlordane proteomic
- 4) ("Chlordane" [Mesh]) AND "proteomics" [Mesh]
- 5) chlordecone proteomic
- 6) ("Chlordecone" [Mesh]) AND "proteomics" [Mesh]
- 7) decabromodiphenyl ether proteomic
- 8) BDE-209 proteomic
- 9) ("Decabromodiphenyl ether" [Mesh]) AND "proteomics" [Mesh]
- 10) dicofol proteomic
- 11) ("Dicofol" [Mesh]) AND "proteomics" [Mesh]
- 12) dieldrin proteomic
- 13) ("Dieldrin" [Mesh]) AND "proteomics" [Mesh]
- 14) endrin proteomic
- 15) ("Endrin" [Mesh]) AND "proteomics" [Mesh]
- 16) heptachlor proteomic
- 17) ("Heptachlor" [Mesh]) AND proteomics [Mesh]
- 18) hexachlorobenzene proteomic
- 19) HCB proteomic
- 20) ("Hexachlorobenzene" [Mesh]) AND "proteomics" [Mesh]
- 21) hexachlorobutadiene proteomic
- 22) ("Hexachlorobutadiene" [Mesh]) AND "proteomics" [Mesh]
- 23) alpha hexachlorocyclohexane proteomic
- 24) ("Alpha hexachlorocyclohexane" [Mesh]) AND "proteomics" [Mesh]
- 25) beta hexachlorocyclohexane proteomic
- 26) ("Beta hexachlorocyclohexane" [Mesh]) AND "proteomics" [Mesh]
- 27) lindane proteomic
- 28) gamma hexachlorocyclohexane proteomic
- 29) ("Hexachlorocyclohexane" [Mesh]) AND "proteomics" [Mesh]
- 30) mirex proteomic
- 31) ("Mirex" [Mesh]) AND "proteomics" [Mesh]
- 32) pentachlorobenzene proteomic
- 33) PeCB proteomic
- 34) ("Pentachlorobenzene" [Mesh]) AND "proteomics" [Mesh]
- 35) pentachlorophenol proteomic
- 36) ("Pentachlorophenol" [Mesh]) AND "proteomics" [Mesh]
- 37) polychlorinated biphenyl proteomic
- 38) PCB proteomic
- 39) ("Polychlorinated biphenyls" [Mesh]) AND "proteomics" [Mesh]
- 40) polychlorinated naphthalenes proteomic
- 41) "polychlorinated naphthalenes" AND "proteomics" [Mesh]
- 42) PFOA proteomic
- 43) perfluorooctanoic acid proteomic
- 44) "perfluorooctanoic acid" AND "proteomics" [Mesh]
- 45) hexabromobiphenyl proteomic
- 46) ("Polybrominated biphenyls" [Mesh]) AND "proteomics" [Mesh]
- 47) hexabromocyclododecane proteomic
- 48) HBCD proteomic
- 49) ("Hexabromocyclododecane" [Mesh]) AND "proteomics" [Mesh]
- 50) hexabromodiphenyl ether proteomic

- 51) ("Hexabromodiphenyl ether 154" [Mesh]) AND "proteomics" [Mesh]
- 52) heptabromodiphenyl ether proteomic
- 53) ("2,2',3,4,4',5',6-heptabromodiphenyl ether" [Mesh]) AND "proteomics" [Mesh]
- 54) short-chain chlorinated paraffins proteomic
- 55) SCCPs proteomic
- 56) "short-chain chlorinated paraffins" AND "proteomics" [Mesh]
- 57) endosulfan proteomic
- 58) ("Endosulfan" [Mesh]) AND "proteomics" [Mesh]
- 59) tetrabromodiphenyl ether proteomic
- 60) BDE-47 proteomic
- 61) ("2,2',4,4'-tetrabromodiphenyl ether" [Mesh]) OR ("2,2',4,5'-tetrabromodiphenyl ether" [Mesh]) AND "proteomics" [Mesh]
- 62) pentabromodiphenyl ether proteomic
- 63) BDE-99 proteomic
- 64) ("Pentabromodiphenyl ether" [Mesh]) AND "proteomics" [Mesh]
- 65) toxaphene proteomic
- 66) ("Toxaphene" [Mesh]) AND "proteomics" [Mesh]
- 67) DDT proteomic
- 68) dichlorodiphenyltrichloroethane proteomic
- 69) ("DDT" [Mesh]) AND "proteomics" [Mesh]
- 70) PFOS proteomic
- 71) perfluorooctane sulfonic acid proteomic
- 72) ("Perfluorooctane sulfonic acid" [Mesh]) AND "proteomics" [Mesh]
- 73) perfluorooctane sulfonyl fluoride proteomic
- 74) "perfluorooctane sulfonyl fluoride" AND "proteomics" [Mesh]
- 75) hexachlorobenzene proteomic
- 76) HCB proteomic
- 77) ("Hexachlorobenzene" [Mesh]) AND "proteomics" [Mesh]
- 78) hexachlorobutadiene proteomic
- 79) HCBd proteomic
- 80) ("Hexachlorobutadiene" [Mesh]) AND "proteomics" [Mesh]
- 81) pentachlorobenzene proteomic
- 82) PeCB proteomic
- 83) ("Pentachlorobenzene" [Mesh]) AND "proteomics" [Mesh]
- 84) polychlorinated dibenzo-p-dioxins proteomic
- 85) PCDD proteomic
- 86) ("Polychlorinated dibenzodioxins" [Mesh]) AND "proteomics" [Mesh]
- 87) polychlorinated dibenzofurans proteomic
- 88) PCDF proteomic
- 89) ("Dibenzofurans, polychlorinated" [Mesh]) AND "proteomics" [Mesh]
- 90) polychlorinated naphthalenes proteomic
- 91) PCN proteomic
- 92) "Polychlorinated naphthalenes" AND "proteomics" [Mesh]

No search filters were applied

Records identified in MEDLINE N = 749
